# Supplementary material
Source: PubMed Central journal article supplement (PMC2947273)

# Supplemental Figure S3

A

E-cadherin

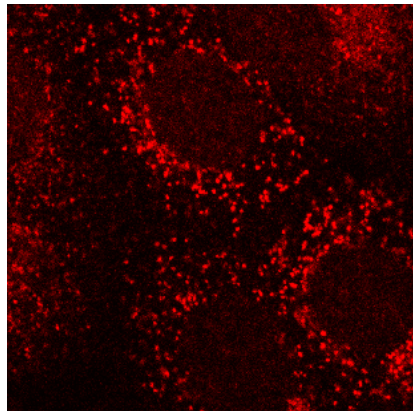

GM130

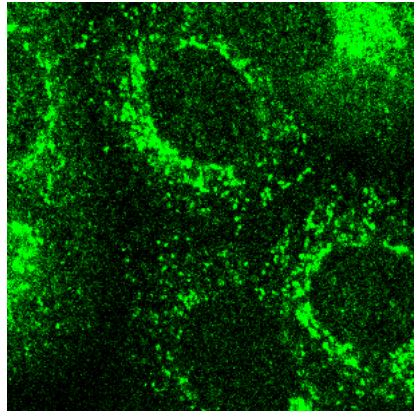

Merged

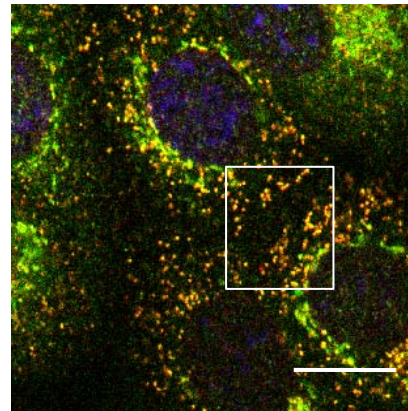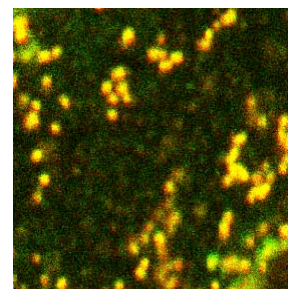

B

E-cadherin

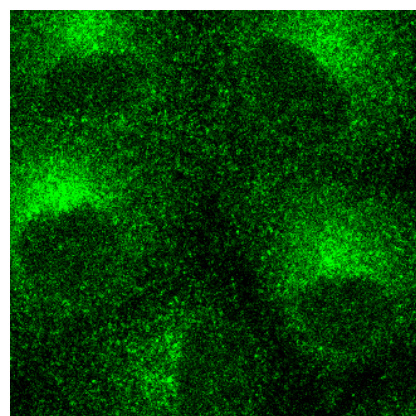

Caveolin-1

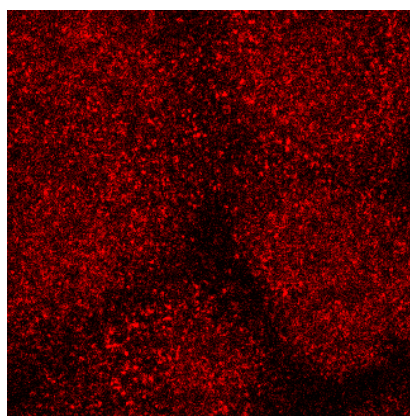

Merged

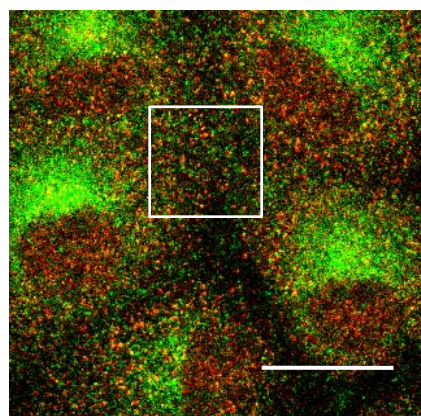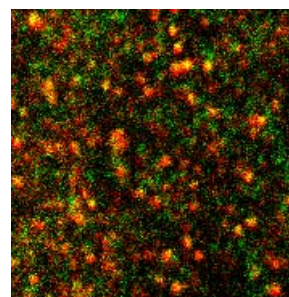

# Supplemental Figure S3

C

E-cadherin

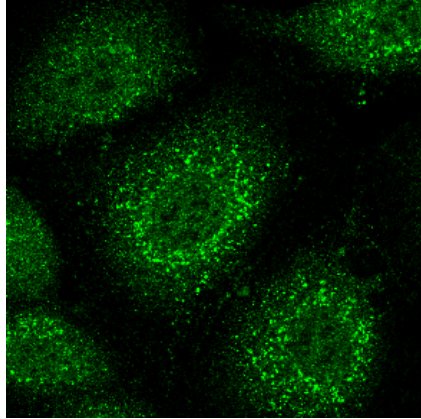

EEA1

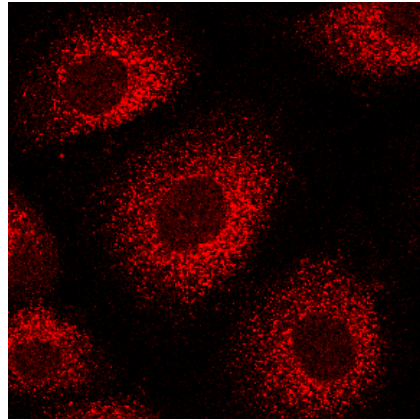

Merged

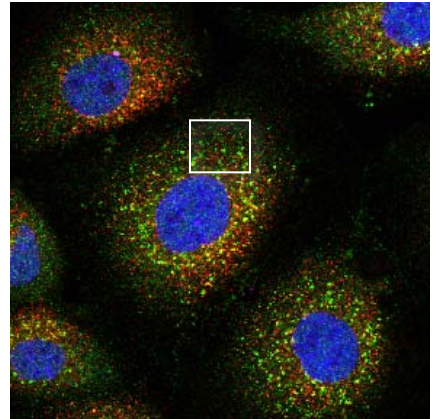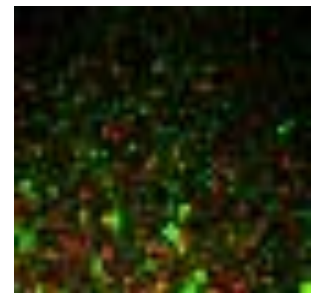

D

E-cadherin

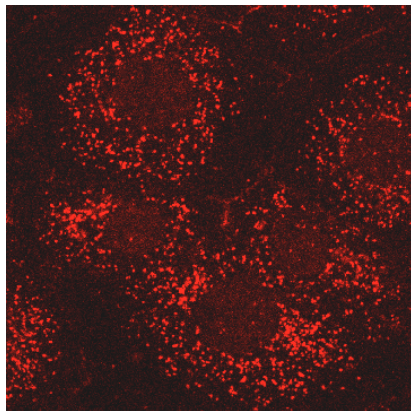

$\beta$ -catenin

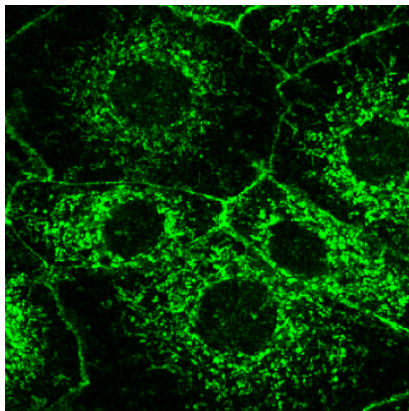

Merged

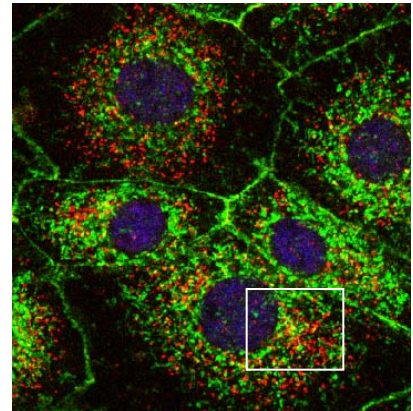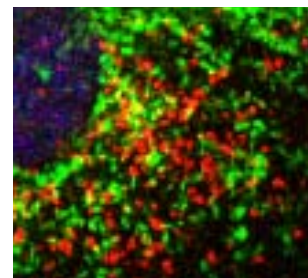

# Supplemental Figure S3

E

E-cadherin

$\beta$ -catenin

Merged

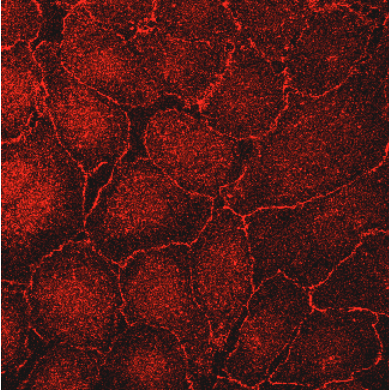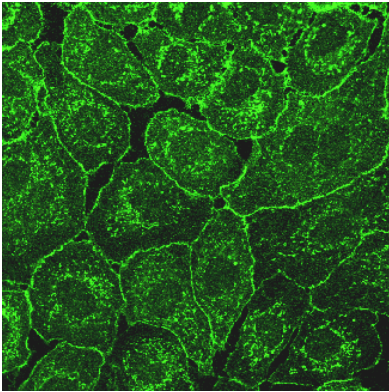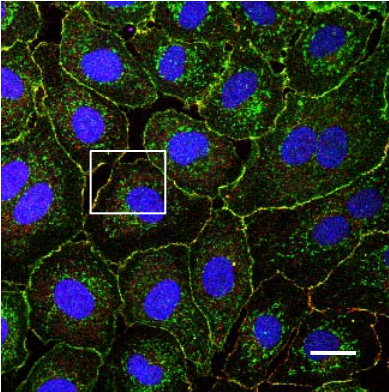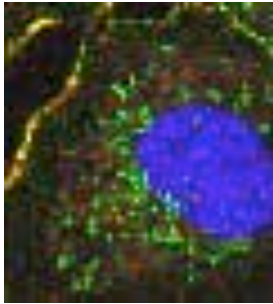

F

E-cadherin

GM130

Merged

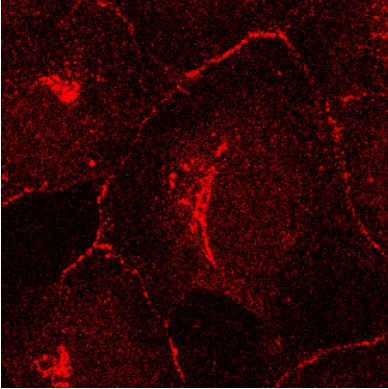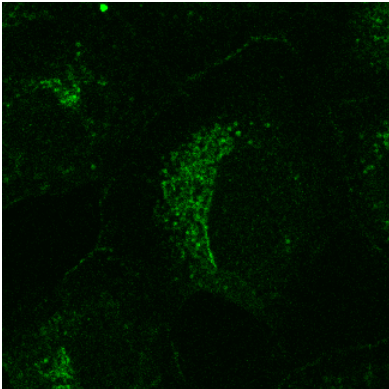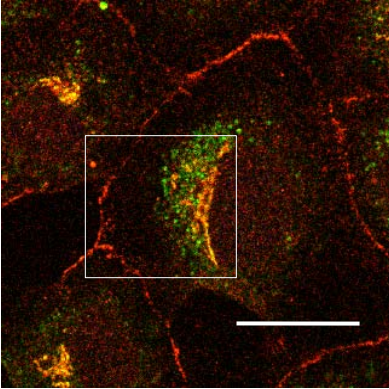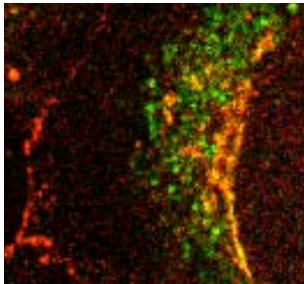

Supplement: mmc3.pdf [file mmc3.pdf]
