# Supplementary material
Source: PubMed Central journal article supplement (PMC2947273)

# Supplemental Figure S1

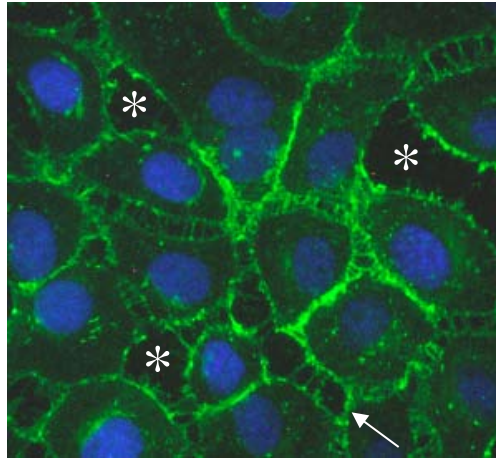

Supplement: mmc1.pdf [file mmc1.pdf]

# Supplemental Figure S2

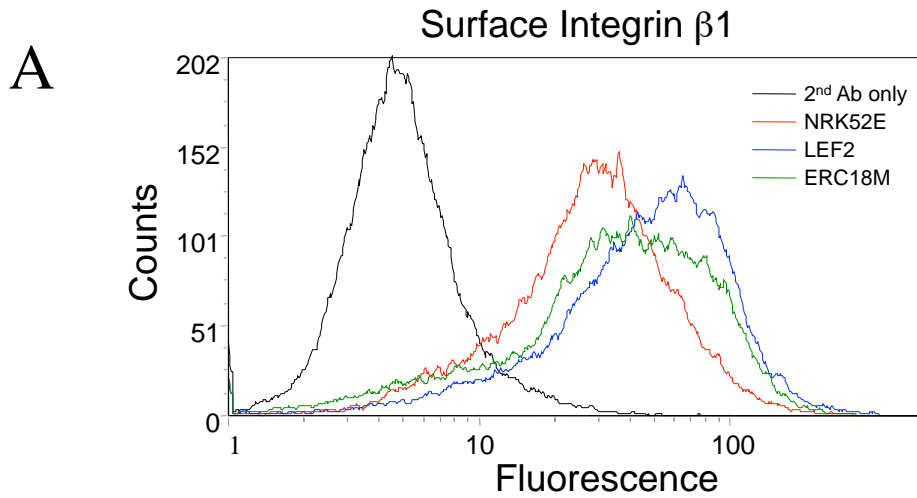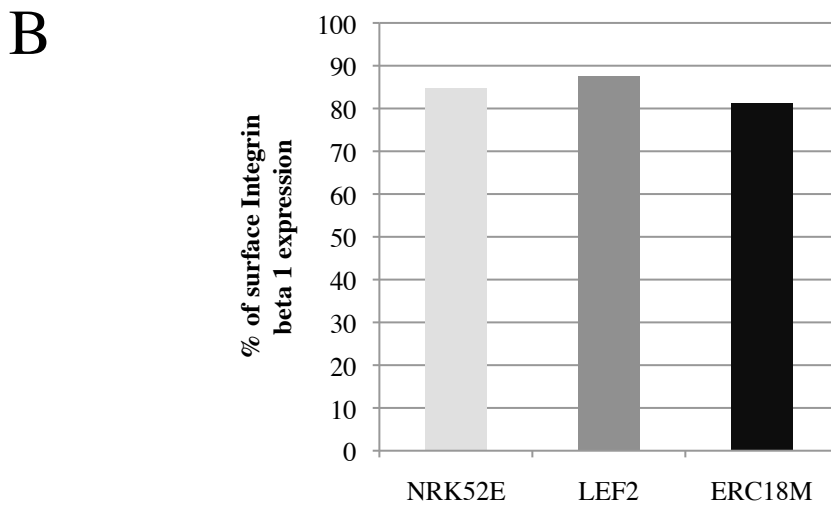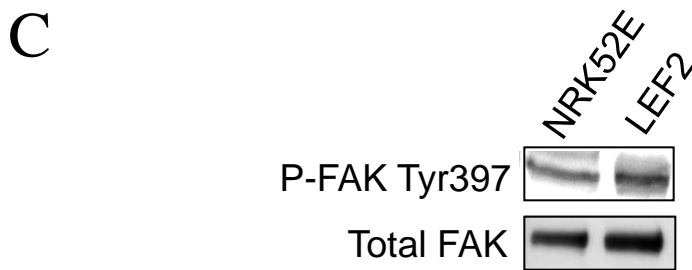

Supplement: mmc2.pdf [file mmc2.pdf]

# Supplemental Figure S4

## E-cadherin

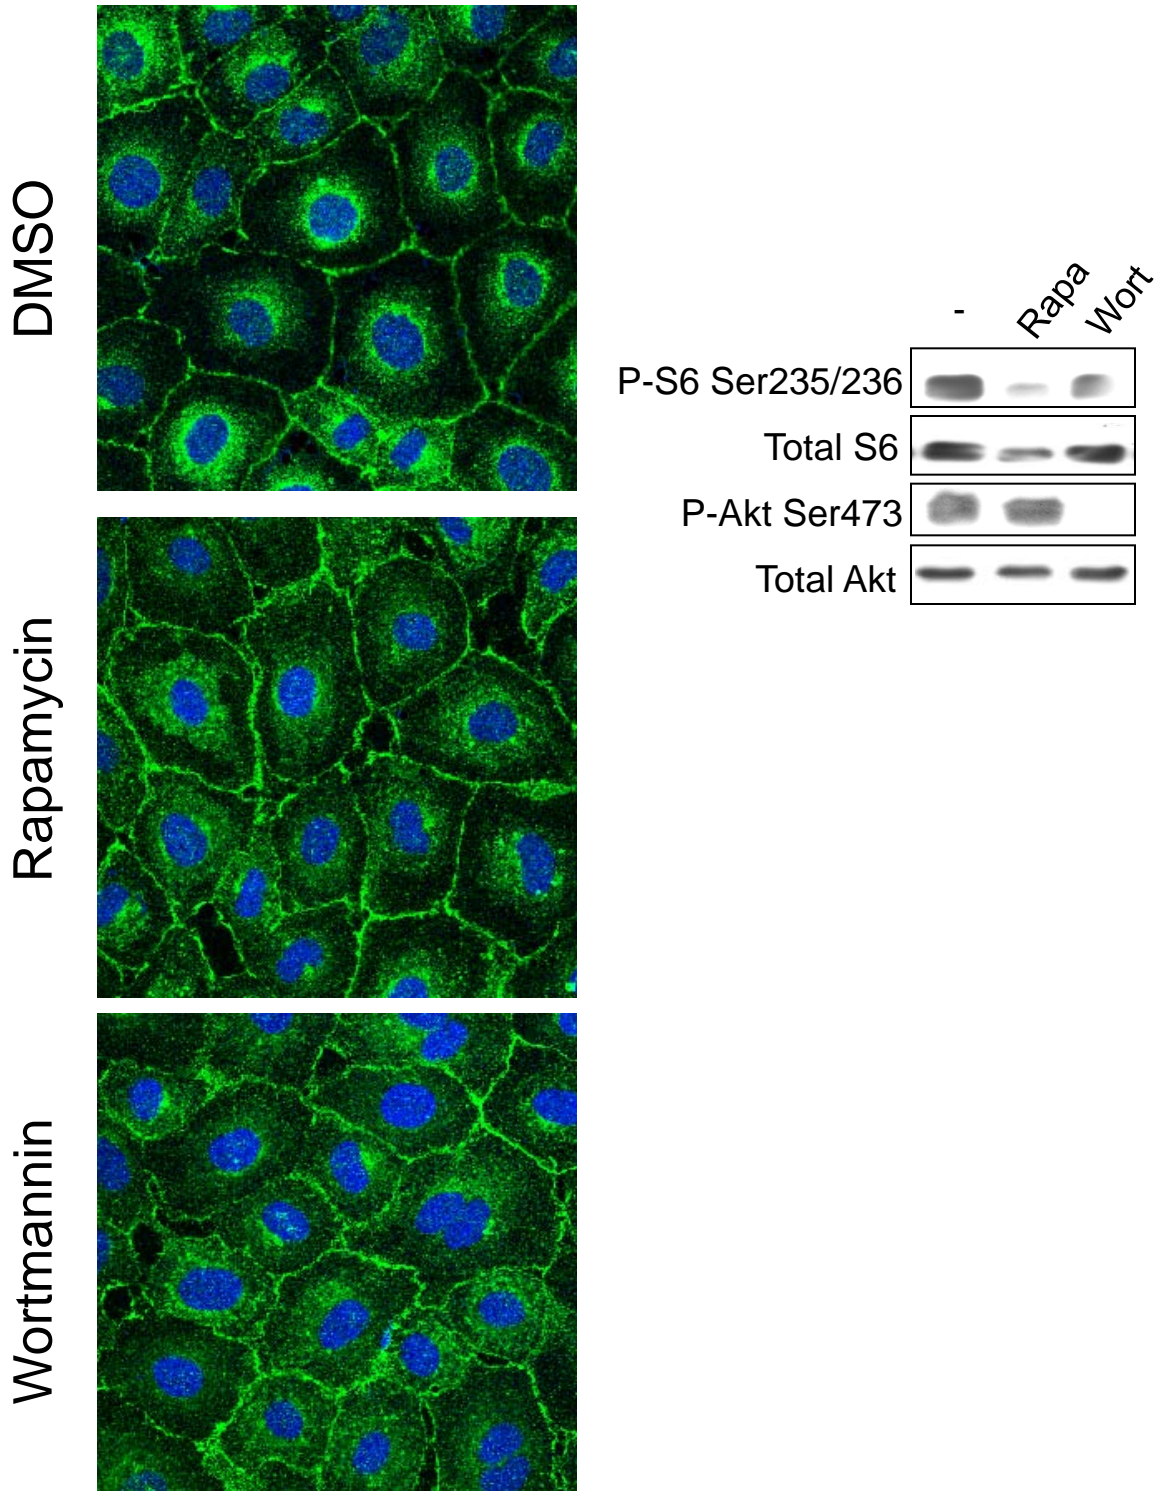

Supplement: mmc4.pdf [file mmc4.pdf]

# Supplemental Figure S5

A

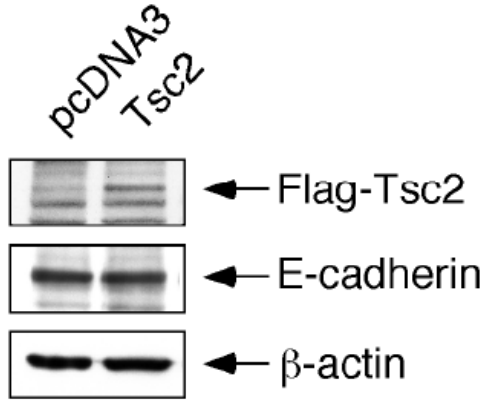

B

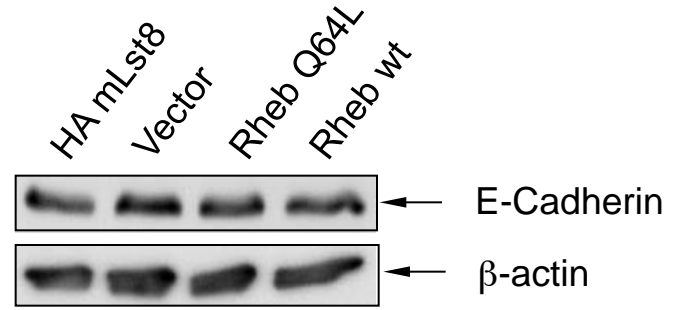

C

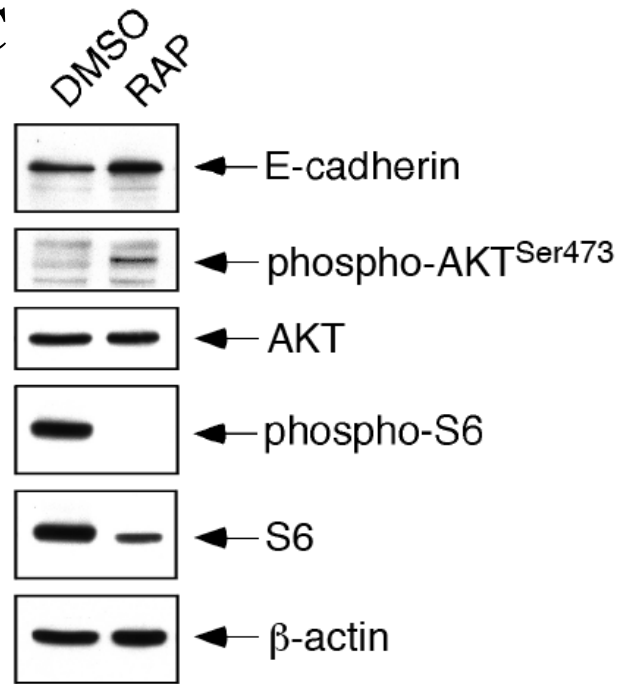

Supplement: mmc5.pdf [file mmc5.pdf]

# Supplemental Figure S6

A

ERC34

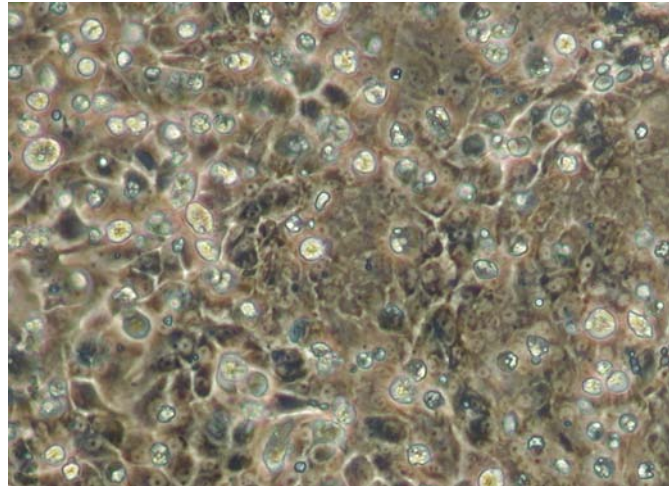

LEF8

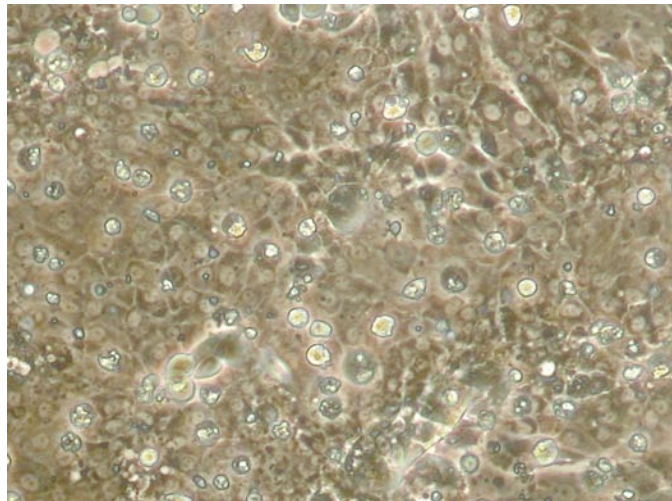

B

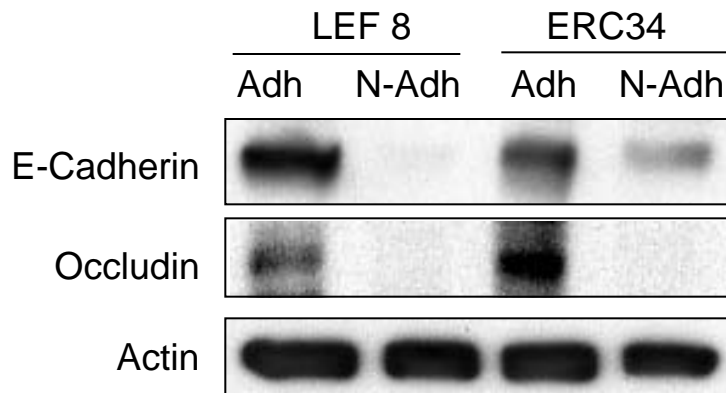

Supplement: mmc6.pdf [file mmc6.pdf]

# Supplemental Figure S7

A

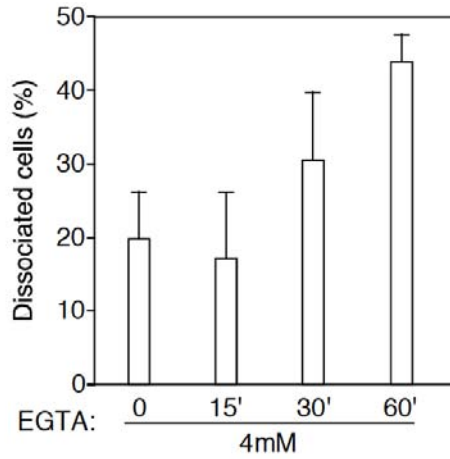

B

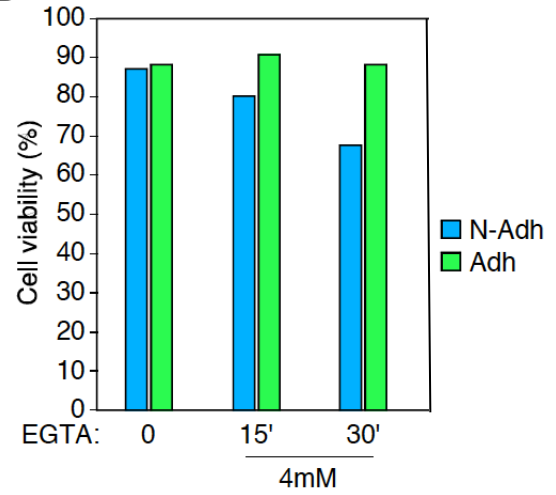

C

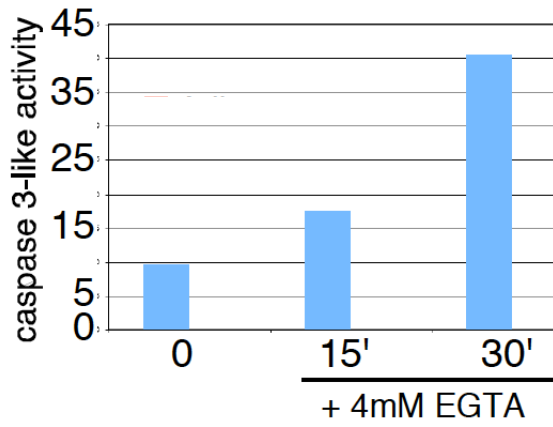

Supplement: mmc7.pdf [file mmc7.pdf]
